# Supplementary material for: Prognostic Factors of Pediatric Acute Myeloid Leukemia Patients with t(8;21) (q22;q22): A Single-Center Retrospective Study
Source: MDPI journal article supplement (doi:10.3390/children11050605), 2024-05-17
Supplement: s1 [file s1]

# Supplementary Information

## Prognostic Factors of Pediatric Acute Myeloid Leukemia Patients with t(8;21) (q22;q22): A Single-Center Retrospective Study

Jiapeng Yang, Xiaohua Zhu, Honghong Zhang, Yang Fu, Zifeng Li, Ziping Xing, Yi Yu, Ping Cao, Jun Le, Junye Jiang, Jun Li, Hongsheng Wang and Xiaowen Zhai \*

Department of Hematology and Oncology, National Children's Medical Center, Children's Hospital of Fudan University, Shanghai, China

\* Correspondence: Xiaowen Zhai, Department of Hematology and Oncology, National Children's Medical Center, Children's Hospital of Fudan University, Shanghai, 201102, China. Email: [xwzhai@fudan.edu.cn](mailto:xwzhai@fudan.edu.cn).

**Table S1.** Definitions of end points.

| End point             | Abbreviation | Definition                                                                                                                                                                                                                                                                                                                                                       |
|-----------------------|--------------|------------------------------------------------------------------------------------------------------------------------------------------------------------------------------------------------------------------------------------------------------------------------------------------------------------------------------------------------------------------|
| Complete remission    | CR           | Bone marrow shows normal hematopoiesis, bone marrow blasts less than 5%, no blasts with Auer rods or persistence of extramedullary leukemia, regeneration of normal cell production in peripheral blood (absolute neutrophil count $> 1 \times 10^9$ /L, platelets $\geq 100 \times 10^9$ /L).<br>Bone marrow blasts 6-19%.<br>Bone marrow blasts more than 20%. |
| Partial remission     | PR           |                                                                                                                                                                                                                                                                                                                                                                  |
| No remission          | NR           |                                                                                                                                                                                                                                                                                                                                                                  |
| Event-free survival   | EFS          | The time from the date of diagnosis to the date of first event (relapse, death of any cause, failure to achieve remission, or secondary malignancy) or last follow-up. Failure to attain morphological remission was considered an event on day 0.                                                                                                               |
| Relapse-free survival | RFS          | The time from the date of achieving CR1 until the first relapse, death or the final follow-up day.                                                                                                                                                                                                                                                               |
| Overall survival      | OS           | The time from the date of diagnosis to the date of last follow-up or death.                                                                                                                                                                                                                                                                                      |
| Event                 |              |                                                                                                                                                                                                                                                                                                                                                                  |
| Relapse               |              | Reappearance of leukemic blasts in the peripheral blood, or the finding of more than 5% blasts in the bone marrow, or extramedullary relapse.                                                                                                                                                                                                                    |
| Secondary malignancy  |              |                                                                                                                                                                                                                                                                                                                                                                  |
| Death                 |              |                                                                                                                                                                                                                                                                                                                                                                  |

Abbreviations: CR1, first complete remission.

**Table S2.** Comparison of characteristics for patients with t(8;21) AML in different consecutive protocols.

| Protocol                              | CHFV-AML 2005      | CCLG-AML-2015       | CALSIII-AML18       | P Value |
|---------------------------------------|--------------------|---------------------|---------------------|---------|
| Period                                | 2005-2014          | 2015-2018           | 2019-2023           |         |
| Number of patients                    | 18                 | 10                  | 20                  |         |
| age (M[range])<br>(months)            | 96.0 (30.0, 168.0) | 140.5 (39.0, 164.0) | 102.5 (38.0, 200.0) | 0.388   |
| WBC (M[range]) ( $\times 10^9$<br>/L) | 16.2 (1.7, 120.6)  | 18.1 (3.7, 123.0)   | 15.5 (5.7, 47.0)    | 0.996   |
| PB blast (M[range])(%)                | 48.0 (10.0, 88.0)  | 44.0 (8.0, 70.0)    | 45.0 (0.0, 82.0)    | 0.787   |
| BM blast (M[range])<br>(%)            | 50.0 (21.5, 87.0)  | 44.1 (16.5, 80.5)   | 55.5 (5.0, 76.0)    | 0.648   |
| PLT (M[range]) ( $\times 10^9$<br>/L) | 25.5 (4.0, 154.0)  | 33.5 (15.0, 96.0)   | 24.5 (11.0, 265.0)  | 0.320   |
| HB (M[range]) (g/L)                   | 80.1 (38.2, 122.0) | 75.6 (44.0, 122.0)  | 74.5 (39.0, 120.0)  | 0.932   |
| Gender                                |                    |                     |                     | 0.253   |
| Female                                | 9 ( 50.0)          | 3 ( 30.0)           | 5 ( 25.0)           |         |
| Male                                  | 9 ( 50.0)          | 7 ( 70.0)           | 15 ( 75.0)          |         |
| FAB                                   |                    |                     |                     | 0.232   |
| M2                                    | 13 ( 72.2)         | 4 ( 40.0)           | 16 ( 80.0)          |         |
| M4                                    | 2 ( 11.1)          | 4 ( 40.0)           | 4 ( 20.0)           |         |
| M5                                    | 2 ( 11.1)          | 1 ( 10.0)           | 0 ( 0.0)            |         |
| NOS                                   | 1 ( 5.6)           | 1 ( 10.0)           | 0 ( 0.0)            |         |
| LOS                                   |                    |                     |                     | 0.217   |
| No                                    | 13 ( 72.2)         | 5 ( 50.0)           | 9 ( 45.0)           |         |
| Yes                                   | 5 ( 27.8)          | 5 ( 50.0)           | 11 ( 55.0)          |         |
| MK                                    |                    |                     |                     | 0.950   |
| No                                    | 14 ( 77.8)         | 8 ( 80.0)           | 15 ( 75.0)          |         |
| Yes                                   | 4 ( 22.2)          | 2 ( 20.0)           | 5 ( 25.0)           |         |
| CK                                    |                    |                     |                     |         |
| No                                    | 17 ( 94.4)         | 7 ( 70.0)           | 17 ( 85.0)          | 0.213   |
| Yes                                   | 1 ( 5.6)           | 3 ( 30.0)           | 3 ( 15.0)           |         |
| EML                                   |                    |                     |                     | 0.423   |
| No                                    | 16 ( 88.9)         | 9 ( 90.0)           | 15 ( 75.0)          |         |
| Yes                                   | 2 ( 11.1)          | 1 ( 10.0)           | 5 ( 25.0)           |         |
| CR1                                   |                    |                     |                     | 0.190   |
| CR                                    | 16 ( 88.9)         | 6 ( 60.0)           | 14 ( 70.0)          |         |
| not in CR                             | 2 ( 11.1)          | 4 ( 40.0)           | 6 ( 30.0)           |         |
| CR2                                   |                    |                     |                     | 0.405   |
| CR                                    | 17 ( 94.4)         | 9 ( 90.0)           | 20 (100)            |         |

|                 |            |           |            |
|-----------------|------------|-----------|------------|
| not in CR       | 1 ( 5.6)   | 1 ( 10.0) | 0 ( 0.0)   |
| Survival status |            |           | 0.262      |
| Censored        | 12 ( 66.7) | 6 ( 60.0) | 17 ( 85.0) |
| Death           | 6 ( 33.3)  | 4 ( 40.0) | 3 ( 15.0)  |

Abbreviations: WBC: White blood cell counts; HB: Hemoglobin; PLT: Platelets; PB blast: Peripheral blast percentage; BM blast: Bone marrow leukemic blast percentage; FAB: French-American-British classification; CR1: First complete remission; CR2: Second complete remission; LOS : Loss of sex chromosome; MK: Monosomal karyotype; EML: Extramedullary leukemia; M: median; CK: Complex karyotype.

**Table S3.** Univariate and multivariate logistic analyses of first complete remission in 20 t(8;21) AML patients who enrolled after 2018.

| Characteristics | CR | CRR  | Univariate |            |         | Multivariate |       |         |
|-----------------|----|------|------------|------------|---------|--------------|-------|---------|
|                 |    |      | OR         | 95%CI      | P Value | OR           | 95%CI | P Value |
| <b>C-KIT</b>    |    |      |            |            |         |              |       |         |
| No              | 6  | 66.7 | Ref        |            |         |              |       |         |
| Yes             | 8  | 66.7 | 1.00       | 0.15-6.35  | 1.000   |              |       |         |
| <b>FLT3/ITD</b> |    |      |            |            |         |              |       |         |
| No              | 13 | 50.0 | Ref        |            |         |              |       |         |
| Yes             | 1  | 68.4 | 0.46       | 0.02-13.01 | 0.606   |              |       |         |

Abbreviations: CR: Complete remission; CRR: Complete remission rate; OR: Odds ratio; CI: Confidence interval; CK: Complex karyotype.

**Table S4.** Univariate and multivariate COX analyses of event-free survival (EFS) in 20 t(8;21) AML patients who enrolled after 2018.

| Characteristics             | Univariate |            |         | Multivariate |       |         |
|-----------------------------|------------|------------|---------|--------------|-------|---------|
|                             | HR         | 95%CI      | P Value | HR           | 95%CI | P Value |
| <b>C-KIT</b>                |            |            |         |              |       |         |
| No                          | Ref        |            |         |              |       |         |
| Yes                         | 1.99       | 0.2-19.39  | 0.554   |              |       |         |
| <b>FLT3/ITD</b>             |            |            |         |              |       |         |
| No                          | Ref        |            |         |              |       |         |
| Yes                         | NA         | NA         | NA      |              |       |         |
| <b>Induction I MRD (%)</b>  |            |            |         |              |       |         |
| <0.1                        | Ref        |            |         |              |       |         |
| ≥0.1                        | 0          | 0-Inf      | 0.999   |              |       |         |
| <b>Induction II MRD (%)</b> |            |            |         |              |       |         |
| <0.1                        | Ref        |            |         |              |       |         |
| ≥0.1                        | 4.29       | 0.38-48.77 | 0.241   |              |       |         |

Abbreviations: WBC: White blood cell counts; HB: Hemoglobin; PLT: Platelets; PB blast: Peripheral blast percentage; BM blast: Bone marrow leukemic blast percentage; FAB: French-American-British classification; LOS: Loss of sex chromosome; MK: Monosomal karyotype; CK: Complex karyotype; CR1: First complete remission; CR2: Second complete remission; EML: Extramedullary leukemia; HR: hazard ratio; CI: confidence interval.

**Table S5.** Univariate and multivariate COX analyses of overall survival (OS) in 48 patients with t(8;21) AML.

| Characteristics           | Univariate |            |         | Multivariate |           |         |
|---------------------------|------------|------------|---------|--------------|-----------|---------|
|                           | HR         | 95%CI      | P Value | HR           | 95%CI     | P Value |
| Gender                    |            |            |         |              |           |         |
| Female                    | Ref        |            |         |              |           |         |
| Male                      | 1.53       | 0.47-4.97  | 0.483   |              |           |         |
| Age at diagnosis (years)  |            |            |         |              |           |         |
| ≤8.6                      | Ref        |            |         |              |           |         |
| >8.6                      | 1.33       | 0.45-3.99  | 0.605   |              |           |         |
| WBC (×10 <sup>9</sup> /L) |            |            |         |              |           |         |
| >20                       | Ref        |            |         |              |           |         |
| ≤20                       | 0.68       | 0.22-2.08  | 0.499   |              |           |         |
| PB blast (%)              |            |            |         |              |           |         |
| <45                       | Ref        |            |         |              |           |         |
| ≥45                       | 1.20       | 0.37-3.93  | 0.765   |              |           |         |
| BM blast (%)              |            |            |         |              |           |         |
| <45                       | Ref        |            |         |              |           |         |
| ≥45                       | 1.01       | 0.34-3.02  | 0.981   |              |           |         |
| FAB                       |            |            |         |              |           |         |
| M2                        | Ref        |            |         |              |           |         |
| M4                        | 0.33       | 0.04-2.55  | 0.285   |              |           |         |
| M5                        | 1.01       | 0.13-7.94  | 0.990   |              |           |         |
| NOS                       | 2.03       | 0.26-15.93 | 0.500   |              |           |         |
| CD19                      |            |            |         |              |           |         |
| No                        | Ref        |            |         |              |           |         |
| Yes                       | 0.61       | 0.19-1.99  | 0.416   |              |           |         |
| CD56                      |            |            |         |              |           |         |
| No                        | Ref        |            |         |              |           |         |
| Yes                       | 0.76       | 0.25-2.32  | 0.629   |              |           |         |
| LOS                       |            |            |         |              |           |         |
| No                        | Ref        |            |         | Ref          |           |         |
| Yes                       | 0.17       | 0.04-0.77  | 0.022   | 0.08         | 0.01-0.48 | 0.005   |
| CK                        |            |            |         |              |           |         |
| No                        | Ref        |            |         |              |           |         |
| Yes                       | 1.36       | 0.30-6.15  | 0.688   |              |           |         |
| MK                        |            |            |         |              |           |         |
| No                        | Ref        |            |         |              |           |         |
| Yes                       | 0.69       | 0.15-3.14  | 0.635   |              |           |         |
| EML                       |            |            |         |              |           |         |
| No                        | Ref        |            |         | Ref          |           |         |

|                   |           |      |           |       |       |            |       |
|-------------------|-----------|------|-----------|-------|-------|------------|-------|
|                   | Yes       | 3.35 | 0.9-12.42 | 0.071 | 10.99 | 2.08-58.12 | 0.005 |
| CR1               |           |      |           |       |       |            |       |
|                   | CR        | Ref  |           |       |       |            |       |
|                   | not in CR | 0.99 | 0.27-3.61 | 0.990 |       |            |       |
| CR2               |           |      |           |       |       |            |       |
|                   | CR        | Ref  |           |       |       |            |       |
|                   | not in CR | ∞    | 0-Inf     | 1.000 |       |            |       |
| Year of diagnosis |           |      |           |       |       |            |       |
|                   | 2005-2014 | Ref  |           |       |       |            |       |
|                   | 2015-2018 | 1.33 | 0.38-4.72 | 0.658 |       |            |       |
|                   | 2019-2023 | 0.88 | 0.22-3.57 | 0.864 |       |            |       |

Abbreviations: WBC: White blood cell counts; HB: Hemoglobin; PLT: Platelets; PB blast: Peripheral blast percentage; BM blast: Bone marrow leukemic blast percentage; FAB: French-American-British classification; LOS : Loss of sex chromosome; MK: Monosomal karyotype; CR1: First complete remission; CR2: Second complete remission; EML: Extramedullary leukemia; HR: hazard ratio; CI: confidence interval; CK: Complex karyotype.

**Table S6.** Univariate and multivariate COX analyses of overall survival (OS) in 20 t(8;21) AML patients who enrolled after 2018.

| Characteristics      | Univariate |       |            | Multivariate |       |         |
|----------------------|------------|-------|------------|--------------|-------|---------|
|                      | HR         | 95%CI | P Value    | HR           | 95%CI | P Value |
| C-KIT                |            |       |            |              |       |         |
|                      | No         | Ref   |            |              |       |         |
|                      | Yes        | 1.48  | 0.15-14.39 | 0.736        |       |         |
| FLT3/ITD             |            |       |            |              |       |         |
|                      | No         | Ref   |            |              |       |         |
|                      | Yes        | NA    | NA         | NA           |       |         |
| Induction I MRD (%)  |            |       |            |              |       |         |
|                      | <0.1       | Ref   |            |              |       |         |
|                      | ≥0.1       | 0     | 0-Inf      | 0.999        |       |         |
| Induction II MRD (%) |            |       |            |              |       |         |
|                      | <0.1       | Ref   |            |              |       |         |
|                      | ≥0.1       | 3.72  | 0.33-41.46 | 0.286        |       |         |

Abbreviations: HR: hazard ratio; CI: confidence interval; MRD: Minimal residual disease.

**Table S7.** Univariate and multivariate COX analyses of relapse-free survival (RFS) in 48 patients with t(8;21) AML.

| Characteristics           | Univariate |            |         | Multivariate |             |         |
|---------------------------|------------|------------|---------|--------------|-------------|---------|
|                           | HR         | 95%CI      | P Value | HR           | 95%CI       | P Value |
| Gender                    |            |            |         |              |             |         |
| Female                    | Ref        |            |         |              |             |         |
| Male                      | 2.20       | 0.60-8.01  | 0.232   |              |             |         |
| Age at diagnosis (months) |            |            |         |              |             |         |
| ≤8.6                      | Ref        |            |         |              |             |         |
| >8.6                      | 1.36       | 0.46-4.06  | 0.580   |              |             |         |
| WBC (×10 <sup>9</sup> /L) |            |            |         |              |             |         |
| >20                       | Ref        |            |         |              |             |         |
| ≤20                       | 0.92       | 0.28-2.99  | 0.887   |              |             |         |
| PB blast (%)              |            |            |         |              |             |         |
| <45                       | Ref        |            |         |              |             |         |
| ≥45                       | 1.27       | 0.39-4.16  | 0.692   |              |             |         |
| BM blast (%)              |            |            |         |              |             |         |
| <50                       | Ref        |            |         |              |             |         |
| ≥50                       | 0.96       | 0.32-2.87  | 0.945   |              |             |         |
| FAB                       |            |            |         |              |             |         |
| M2                        | Ref        |            |         |              |             |         |
| M4                        | 0.29       | 0.04-2.27  | 0.240   |              |             |         |
| M5                        | 0          | 0-Inf      | 0.998   |              |             |         |
| NOS                       | 1.86       | 0.24-14.45 | 0.553   |              |             |         |
| CD19                      |            |            |         |              |             |         |
| No                        | Ref        |            |         |              |             |         |
| Yes                       | 0.60       | 0.19-1.96  | 0.399   |              |             |         |
| CD56                      |            |            |         |              |             |         |
| No                        | Ref        |            |         |              |             |         |
| Yes                       | 0.73       | 0.24-2.23  | 0.577   |              |             |         |
| LOS                       |            |            |         |              |             |         |
| No                        | Ref        |            |         | Ref          |             |         |
| Yes                       | 0.28       | 0.08-1.00  | 0.051   | 0.21         | 0.05 - 0.90 | 0.035   |
| CK                        |            |            |         |              |             |         |
| No                        | Ref        |            |         |              |             |         |
| Yes                       | 1.24       | 0.27-5.62  | 0.778   |              |             |         |
| MK                        |            |            |         |              |             |         |
| No                        | Ref        |            |         |              |             |         |
| Yes                       | 0.62       | 0.14-2.83  | 0.541   |              |             |         |
| EML                       |            |            |         |              |             |         |
| No                        | Ref        |            |         | Ref          |             |         |

|                   |           |          |            |       |      |            |       |
|-------------------|-----------|----------|------------|-------|------|------------|-------|
|                   | Yes       | 2.94     | 0.79-10.95 | 0.108 | 6.55 | 1.40-30.63 | 0.017 |
| CR1               | CR        | Ref      |            |       |      |            |       |
|                   | not in CR | 0.62     | 0.14-2.80  | 0.534 |      |            |       |
| CR2               | CR        | Ref      |            |       |      |            |       |
|                   | not in CR | $\infty$ | 0-Inf      | 1.000 |      |            |       |
| Year of diagnosis | 2005-2014 | Ref      |            |       |      |            |       |
|                   | 2015-2018 | 1.44     | 0.41-5.11  | 0.574 |      |            |       |
|                   | 2019-2023 | 0.79     | 0.20-3.19  | 0.745 |      |            |       |

Abbreviations: WBC: White blood cell counts; HB: Hemoglobin; PLT: Platelets; PB blast: Peripheral blast percentage; BM blast: Bone marrow leukemic blast percentage; FAB: French-American-British classification; LOS : Loss of sex chromosome; MK: Monosomal karyotype; CR1: First complete remission; CR2: Second complete remission; EML: Extramedullary leukemia; HR: hazard ratio; CI: confidence interval; CK: Complex karyotype.

**Table S8.** Univariate and multivariate COX analyses of relapse-free survival (RFS) in 20 t(8;21) AML patients who enrolled after 2018.

| Characteristics      | Univariate |            |         | Multivariate |       |         |
|----------------------|------------|------------|---------|--------------|-------|---------|
|                      | HR         | 95%CI      | P Value | HR           | 95%CI | P Value |
| KIT                  |            |            |         |              |       |         |
| No                   | Ref        |            |         |              |       |         |
| Yes                  | 1.99       | 0.20-19.39 | 0.554   |              |       |         |
| FLT3/ITD             |            |            |         |              |       |         |
| No                   | Ref        |            |         |              |       |         |
| Yes                  | NA         | NA         | NA      |              |       |         |
| Induction I MRD (%)  |            |            |         |              |       |         |
| <0.1                 | Ref        |            |         |              |       |         |
| $\geq 0.1$           | 0          | 0-Inf      | 0.999   |              |       |         |
| Induction II MRD (%) |            |            |         |              |       |         |
| <0.1                 | Ref        |            |         |              |       |         |
| $\geq 0.1$           | 4.29       | 0.38-48.77 | 0.241   |              |       |         |

Abbreviations: HR: hazard ratio; CI: confidence interval; CK: Complex karyotype; MRD: Minimal residual disease.

## Supplementary Figure

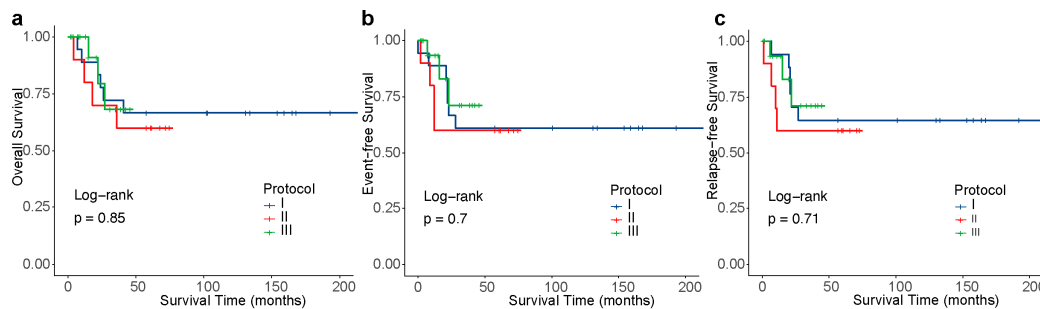

**Figure S1.** Probability of survival for patients with t(8; 21) AML in the protocols: (I) CHFU-AML 2005, (II) CCLG-AML 2015, (III) CALSIII-AML18. (a) Probabilities of 3-year overall survival (OS)  $\pm$  standard deviations (SD):  $0.72 \pm 0.11$ ,  $0.60 \pm 0.16$ ,  $0.68 \pm 0.15$  in periods I–III, respectively. (b) Probabilities of three-year event-free survival (EFS)  $\pm$  SD:  $0.62 \pm 0.12$ ,  $0.60 \pm 0.16$ ,  $0.71 \pm 0.15$  in periods I–III, respectively. (c) Probabilities of three-year relapse-free survival (RFS)  $\pm$  SD:  $0.65 \pm 0.12$ ,  $0.60 \pm 0.16$ ,  $0.71 \pm 0.15$  in periods I–III, respectively.

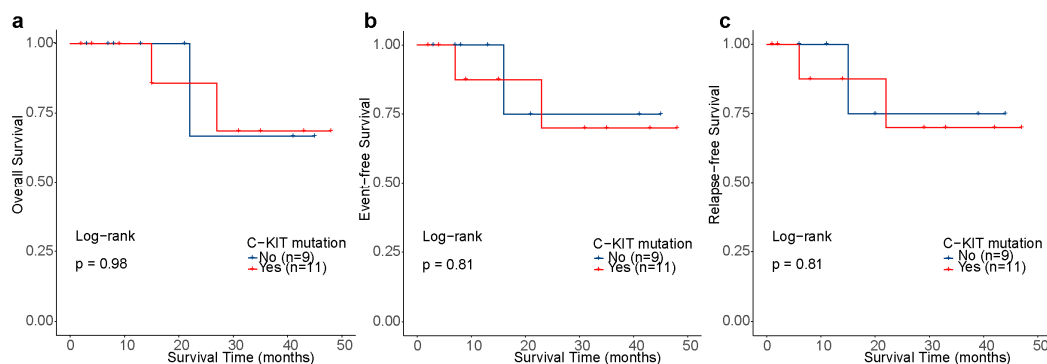

**Figure S2.** Probability of survival depending on the C-KIT mutation in t(8;21) AML. Kaplan–Meier survival curves of overall survival (OS) (a), event-free survival (EFS) (b) and relapse-free survival (RFS) (c) for patients stratified by C-KIT mutation.

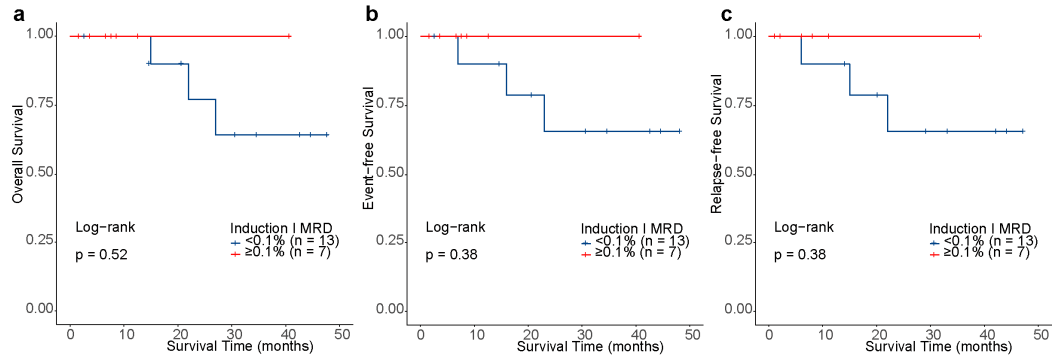

**Figure S3.** Probability of survival depending on the Induction I Minimal residual disease (MRD) status in t(8;21) AML. Kaplan–Meier survival curves of overall survival (OS) (a), event-free survival (EFS) (b) and relapse-free survival (RFS) (c) for patients stratified by Induction I MRD status.

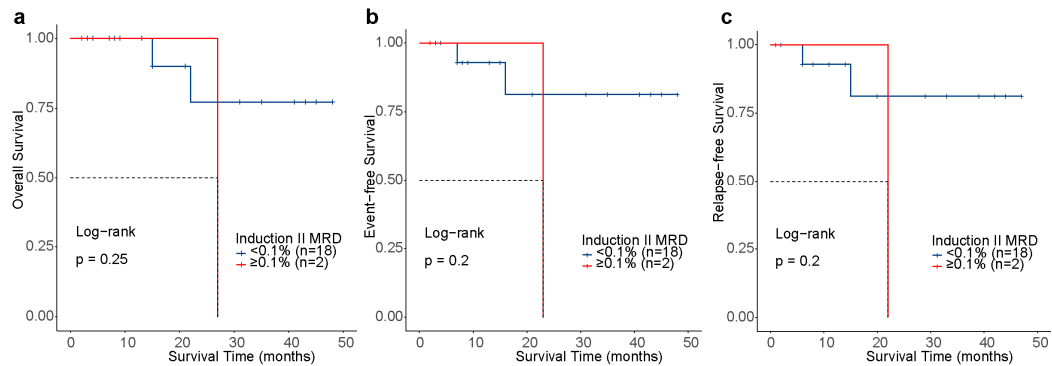

**Figure S4.** Probability of survival depending on the Induction II Minimal residual disease (MRD) status in t(8;21) AML. Kaplan–Meier survival curves of overall survival (OS) (a), event-free survival (EFS) (b) and relapse-free survival (RFS) (c) for patients stratified by Induction II MRD status.
